# Supplementary material for: The regenerated silk fibroin hydrogel with designed architecture bioprinted by its microhydrogel
Source: Royal Society of Chemistry journal article supplement (doi:10.1039/c9tb00783k), 2019-01-01
Supplement: c9tb00783k1.pdf [file c9tb00783k1.pdf]

## ***Supplementary Information***

The regenerated silk fibroin hydrogel with designed architecture bioprinted by  
its microhydrogel

Tao Dong,<sup>a</sup> Ruixin Mi,<sup>a</sup> Mi Wu,<sup>a</sup> Nongping Zhong,<sup>b</sup> Xia Zhao,<sup>b</sup> Xin Chen<sup>a</sup> and Zhengzhong Shao\*<sup>a</sup>

- a. State Key Laboratory of Molecular Engineering of Polymers, Laboratory of Advanced Materials and Department of Macromolecular Science, Fudan University, Shanghai 200433, China.
- b. Department of Otorhinolaryngol Head & Neck Surgery, Huashan Hospital, Fudan University, 12 Middle Wulumuqi Road, Shanghai, 200040, China.

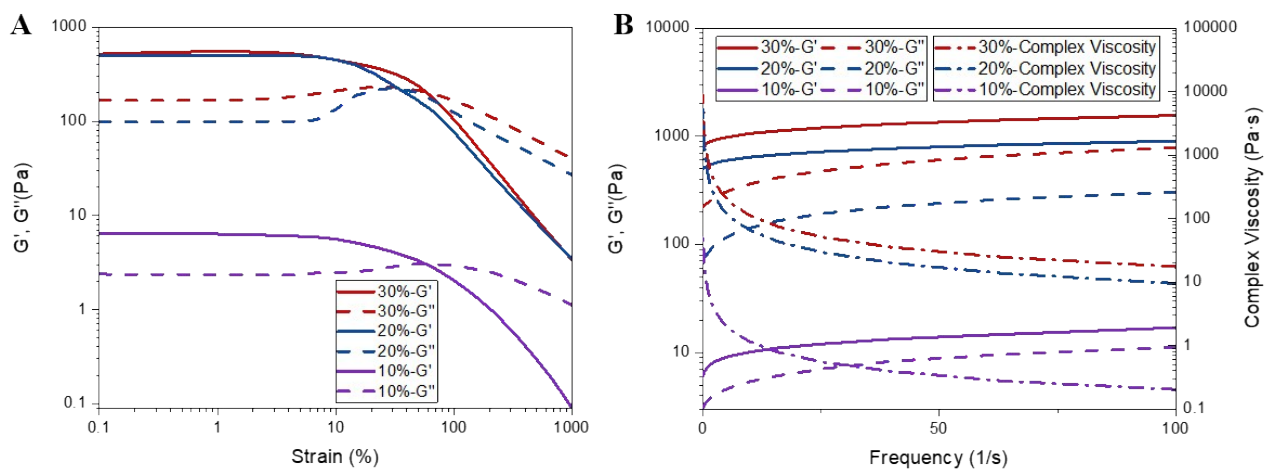

**Fig. S1** (A) Strain and (B) Frequency sweep of RSF microhydrogel.

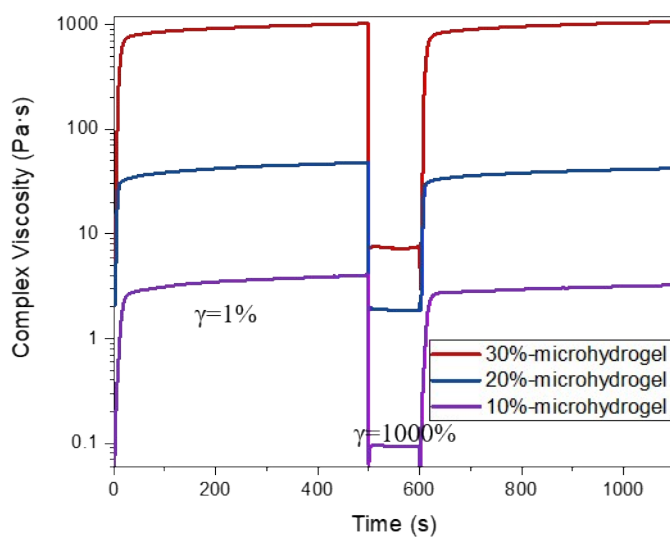

**Fig. S2** Shear thinning and recovery for complex viscosity of RSF microhydrogel in 3ITT.

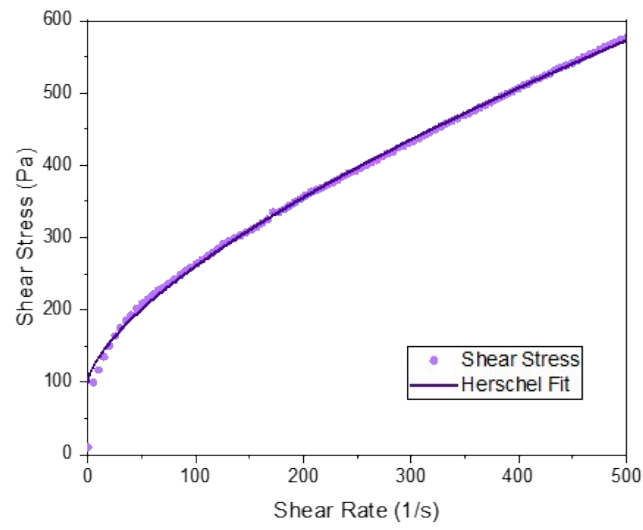

**Fig.S3** Shear stress as a function of shear rate and Herschel-Bulkley model fitting of 30%-microhydrogel.

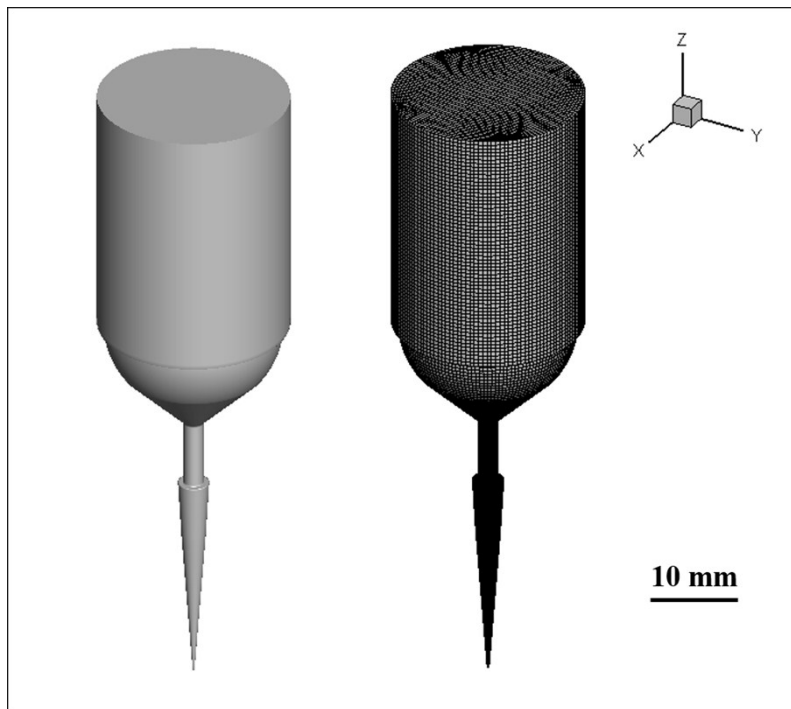

**Fig. S4** 3D model and meshing of bioprinting syringe with a 0.26 mm conical needle. The model was divided into around  $6.9 \times 10^5$  cells,  $2.1 \times 10^6$  faces and  $7.2 \times 10^5$  nodes.

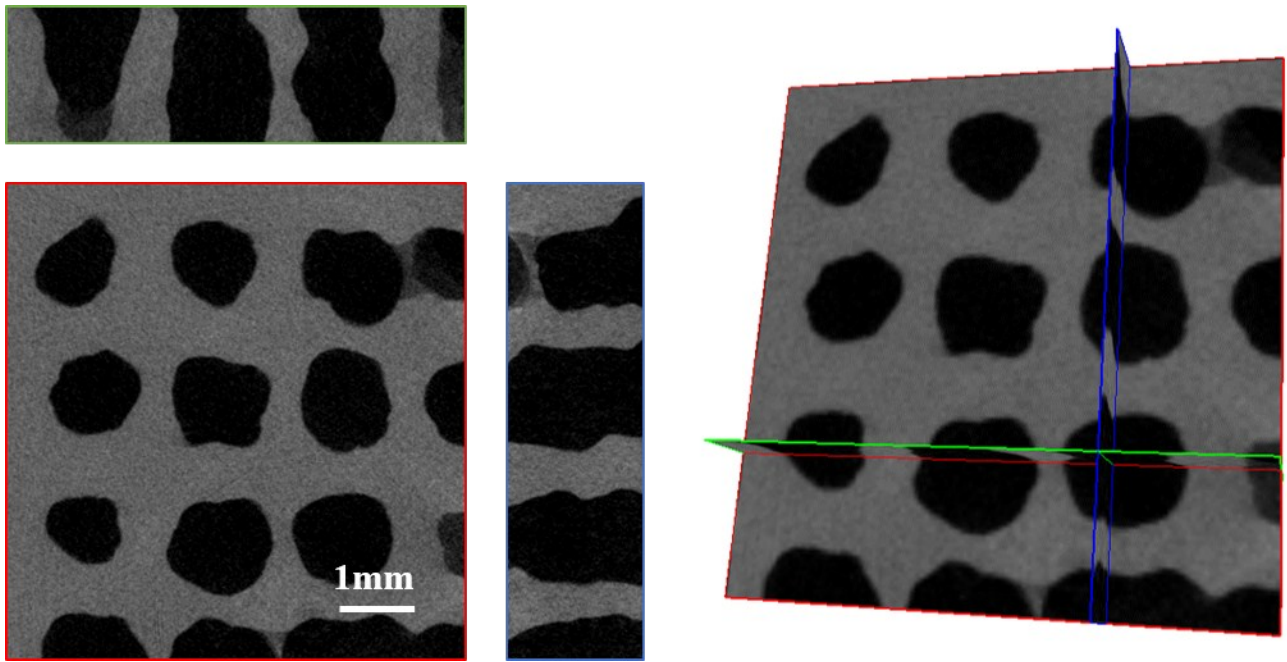

**Fig. S5** Transverse (red), coronal (green) and sagittal (blue) plane of the bioprinted RSF hydrogel by Micro-CT reconstruction.

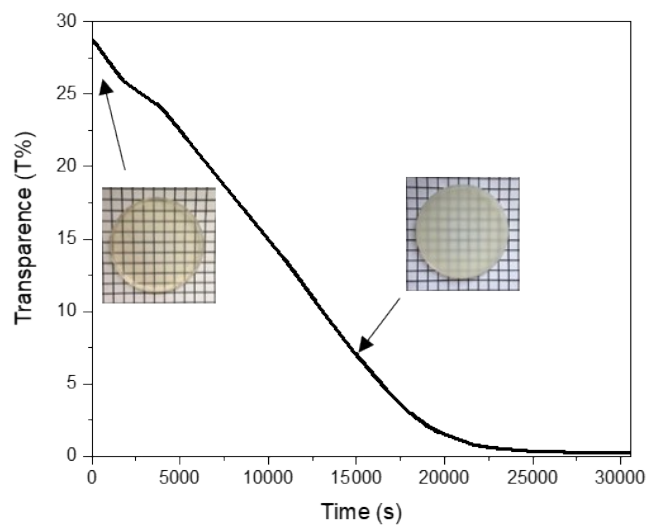

**Fig. S6** Transmittance of RSF microhydrogel under visible light versus time, which measured in UV-Vis spectrophotometer using a cuvette. Inset: images corresponding to each state with a sample of 90 mm in diameter and 2 mm in height.

**Table. S1** Modulus change before/after microhydrogel ripening and viscosity during 3D printing

|                          | Solid content (wt) | Viscosity while printing (Pa·s) <sup>***</sup> | Modulus before ripening (Pa) <sup>*</sup> | Modulus after ripening (MPa) <sup>**</sup> |
|--------------------------|--------------------|------------------------------------------------|-------------------------------------------|--------------------------------------------|
| <b>30%-microhydrogel</b> | 28.0%              | 7.4                                            | 18800                                     | 10.6                                       |
| <b>20% microhydrogel</b> | 18.7%              | 1.9                                            | 4420                                      | 3.2                                        |
| <b>10% microhydrogel</b> | 9.3%               | 0.1                                            | 314                                       | 1.1                                        |

\* Complex viscosity measured with an amplitude of 1000% in rheological tests

\*\* Storage modulus measured with an amplitude of 1% measured in rheological tests

\*\*\* Compressive modulus measured in compression experiment

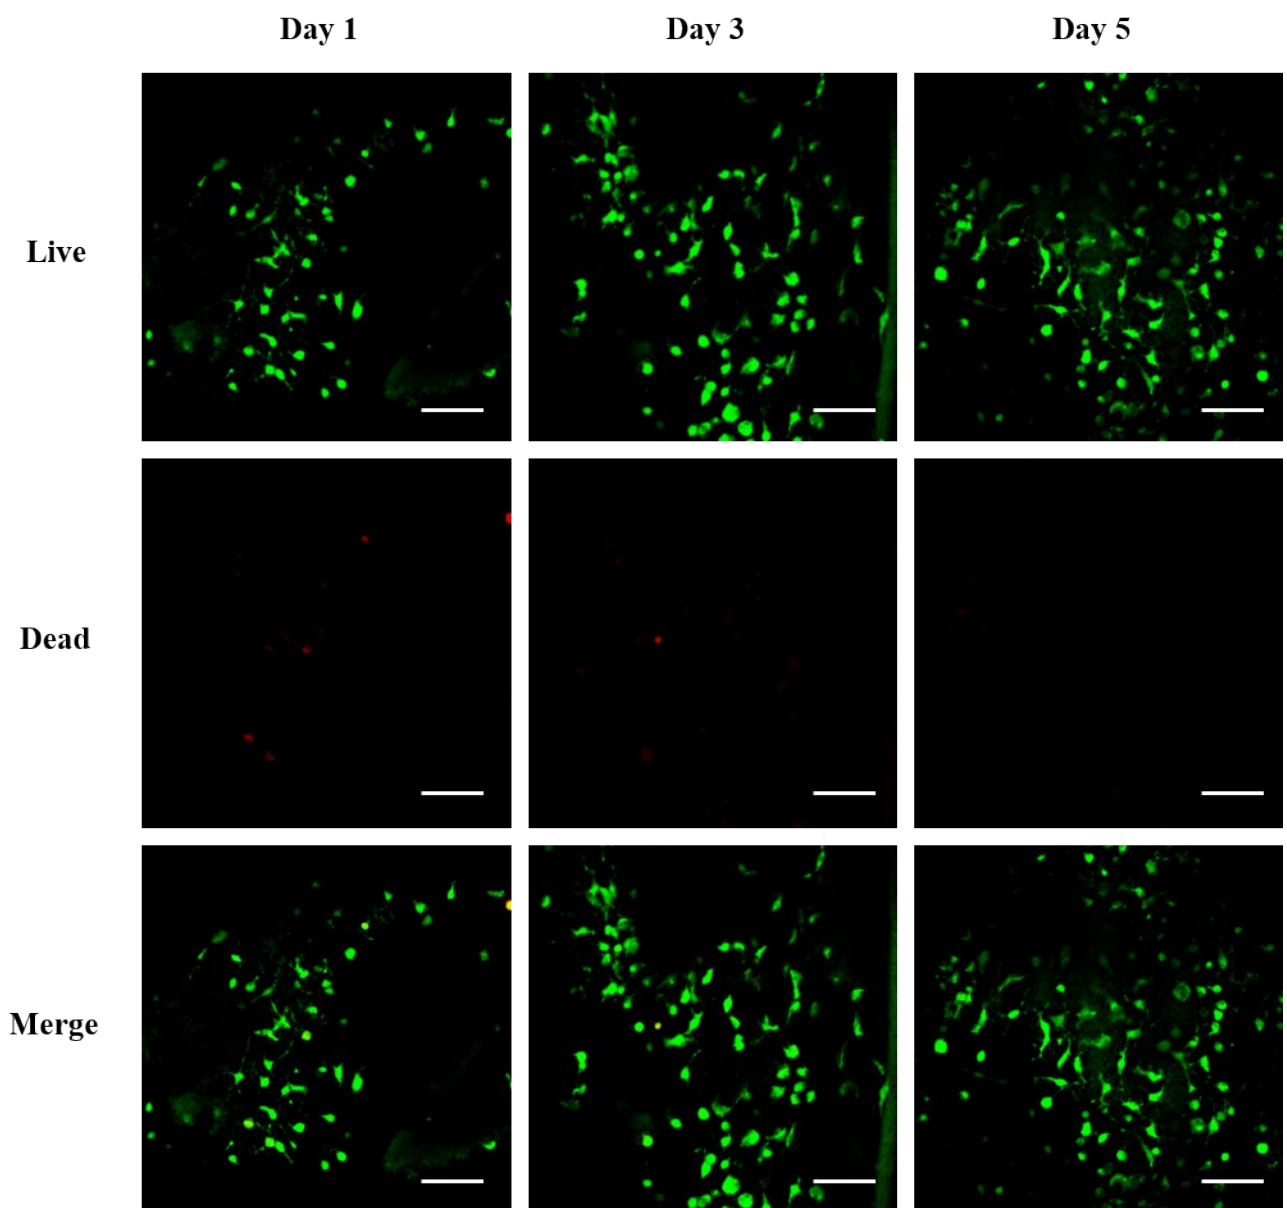

**Fig. S7** Live/dead confocal microscopy images of hMSCs-laden bioprinted RSF hydrogel in 1, 3 and 5 days cultured. Scale bar is 100  $\mu\text{m}$ .
